# Supplementary material for: Reciprocal Relations between the Trajectories of Mothers’ Harsh Discipline, Responsiveness and Aggression in Early Childhood
Source: Springer Nature journal article supplement (doi:10.1007/s10802-017-0280-y), 2017-02-18
Supplement: MOESM1 [file 12076626]

Appendix A. The estimated unstandardized and standardized (in parentheses) coefficients of the control variables.

|  | Covariates | | |
| --- | --- | --- | --- |
|  | Gender | SES | Reactivity > 60 |
| Intercept of aggressive behaviors | 7.603**  (.194) | -1.084*  (-.056) | 16.041**  (.369) |
| Change in aggressive behaviors |  |  |  |
| Age 3-4 | 3.715*  (.084) | -2.147*  (-.098) | 5.784**  (.118) |
| Age 4-5 | 3.347*  (.023) | -2.073*  (.399) | 6.260**  (-.042) |
| Age 5-6 | 5.172**  (-.042) | -.205  (-.180) | 6.455**  (-.023) |
| Age 6-7 | 3.350*  (.094) | -1.932*  (-.109) | 3.486*  (.088) |
| Intercept of maternal responsiveness | -1.345  (-.036) | 8.713**  (.473) | -2.809*  (-.068) |
| Change in maternal responsiveness |  |  |  |
| Age 3-4 | 1.151  (.028) | 6.216**  (.306) | -2.425  (-.053) |
| Age 4-5 | .884  (.023) | 7.589**  (.399) | -1.777  (-.042) |
| Age 5-6 | .008  (.000) | 5.419**  (.274) | -2.661*  (-.060) |
| Age 6-7 | .488  (.012) | 6.313**  (.320) | -3.692*  (-.084) |
| Intercept of maternal harsh discipline | 1.821  (.056) | -2.142**  (-.133) | 8.057**  (.223) |
| Change in maternal harsh discipline |  |  |  |
| Age 3-4 | -1.948*  (-.052) | -2.185**  (-.118) | -1.077  (-.026) |
| Age 4-5 | -1.517  (-.042) | -3.195**  (-.180) | -.907  (-.023) |
| Age 5-6 | .383  (.009) | -1.451*  (-.068) | -.679  (-.014) |
| Age 6-7 | 1.664  (.036) | -2.278**  (-.099) | -.143  (-.003) |

Notes: ** p<.01, * p<.05
